# Supplementary material
Source: PubMed Central journal article supplement (PMC8878153)
Supplement: NIHMS1779552-supplement-1.pdf [file NIHMS1779552-supplement-1.pdf]

**Neuron, Volume 101**

**Supplemental Information**

**A Selectivity Filter Gate Controls**

**Voltage-Gated Calcium Channel**

**Calcium-Dependent Inactivation**

**Fayal Abderemane-Ali, Felix Findeisen, Nathan D. Rossen, and Daniel L. Minor Jr.**

**Supplementary material for**

**A selectivity filter gate controls voltage-gated calcium channel calcium-dependent inactivation**

Fayal Abderemane-Ali<sup>1</sup>, Felix Findeisen<sup>1</sup>, Nathan D. Rossen<sup>1</sup>, and Daniel L. Minor, Jr.<sup>1-5\*\*†</sup>

<sup>1</sup>Cardiovascular Research Institute

<sup>2</sup>Departments of Biochemistry and Biophysics, and Cellular and Molecular Pharmacology

<sup>3</sup>California Institute for Quantitative Biomedical Research

<sup>4</sup>Kavli Institute for Fundamental Neuroscience

University of California, San Francisco, California 93858-2330 USA

<sup>5</sup>Molecular Biophysics and Integrated Bio-imaging Division

Lawrence Berkeley National Laboratory, Berkeley, CA 94720 USA

\*Correspondence to: [daniel.minor@ucsf.edu](mailto:daniel.minor@ucsf.edu)

†Lead contact

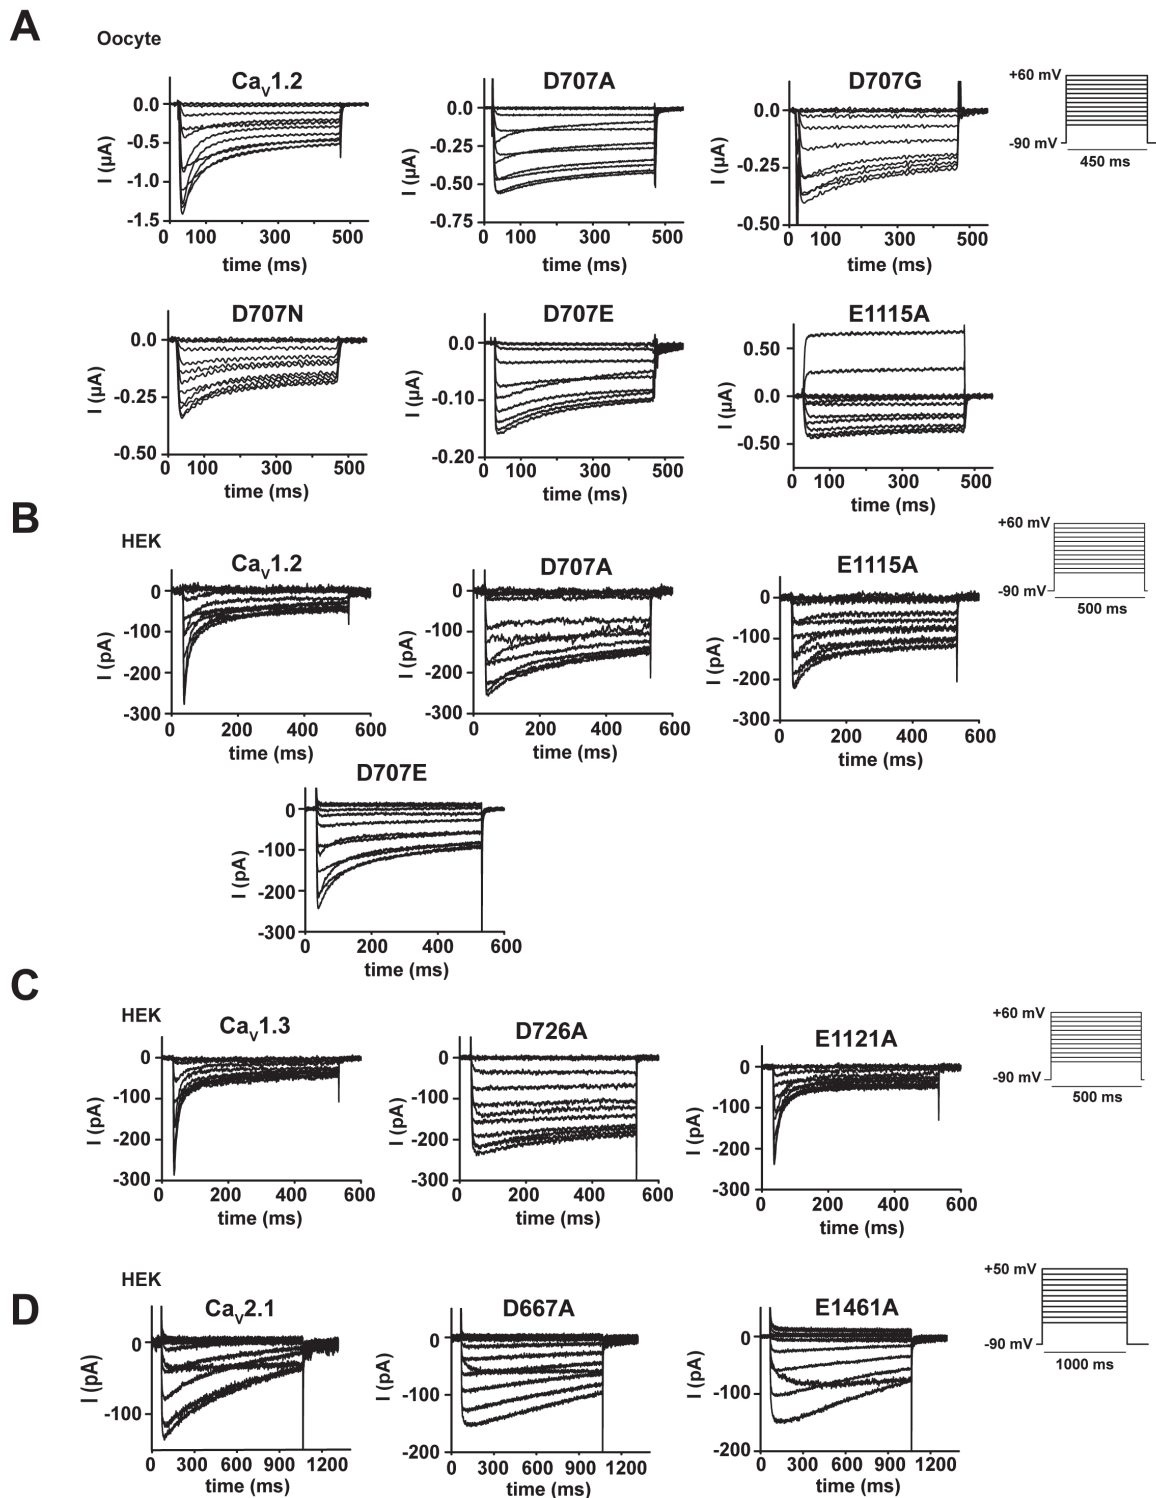

**Figure S1 Exemplar Ca<sup>2+</sup> currents for Ca<sub>v</sub>1.2, Ca<sub>v</sub>1.3, Ca<sub>v</sub>2.1, and mutants co-expressed with Ca<sub>v</sub>β<sub>2a</sub>. Related to Figures 1, 2, and 4. Exemplar traces recorded in **A**, *Xenopus* oocytes expressing Ca<sub>v</sub>1.2 or the indicated mutants, **B**, HEK 293 cells expressing Cav1.2 or the indicated mutants, **C**, HEK 293 cells expressing Ca<sub>v</sub>1.3 or the indicated mutants, and **D**, HEK 293 cells expressing Ca<sub>v</sub>2.1 or the indicated mutants. Currents were evoked using a multi-step activation protocol (insets).**

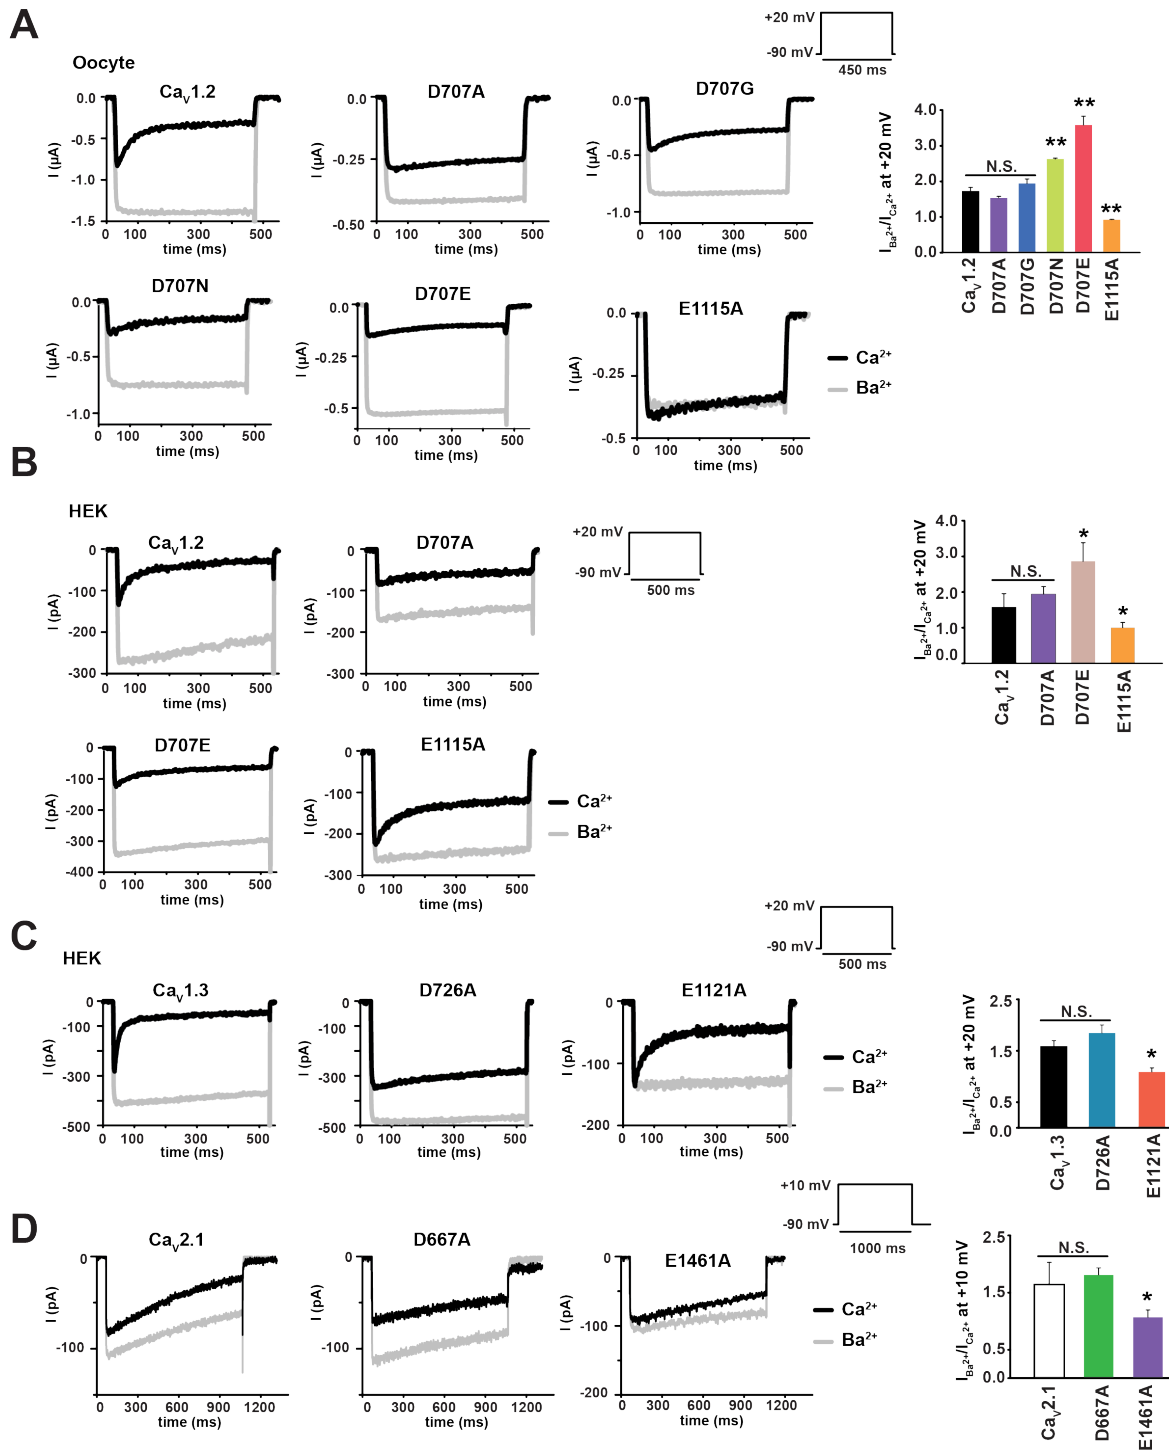

**Figure S2 SFII (+1) mutants do not dramatically reduce  $\text{Ca}_v$  selectivity properties. Related to Figures 1, 2, and 4. A**, Exemplar recordings at +20 mV in  $\text{Ca}^{2+}$  (black) or  $\text{Ba}^{2+}$  (grey) from *Xenopus* oocytes expressing  $\text{Ca}_v1.2$  or indicated mutants, **B**, from HEK293 cells expressing  $\text{Ca}_v1.2$  or indicated mutants, **C**, from HEK293 cells expressing  $\text{Ca}_v1.3$  or indicated mutants, and **D**, HEK293 cells expressing  $\text{Ca}_v2.1$  or indicated mutants. Right panels represent averaged values of ratios between  $\text{Ba}^{2+}$  and  $\text{Ca}^{2+}$  peak current amplitude at +20 mV or  $\text{Ca}_v1.2$  and  $\text{Ca}_v1.3$  or at +10 mV for  $\text{Ca}_v2.1$ . ‘\*’ indicates  $p < 0.01$ , ‘\*\*\*’ indicates  $p < 0.001$ , and ‘N.S.’ indicates ‘not statistically significant’ compared to wild-type channels. n values for all bar graphs are in Table 1. All recordings were made with  $\text{Ca}_v\beta_{2a}$ .

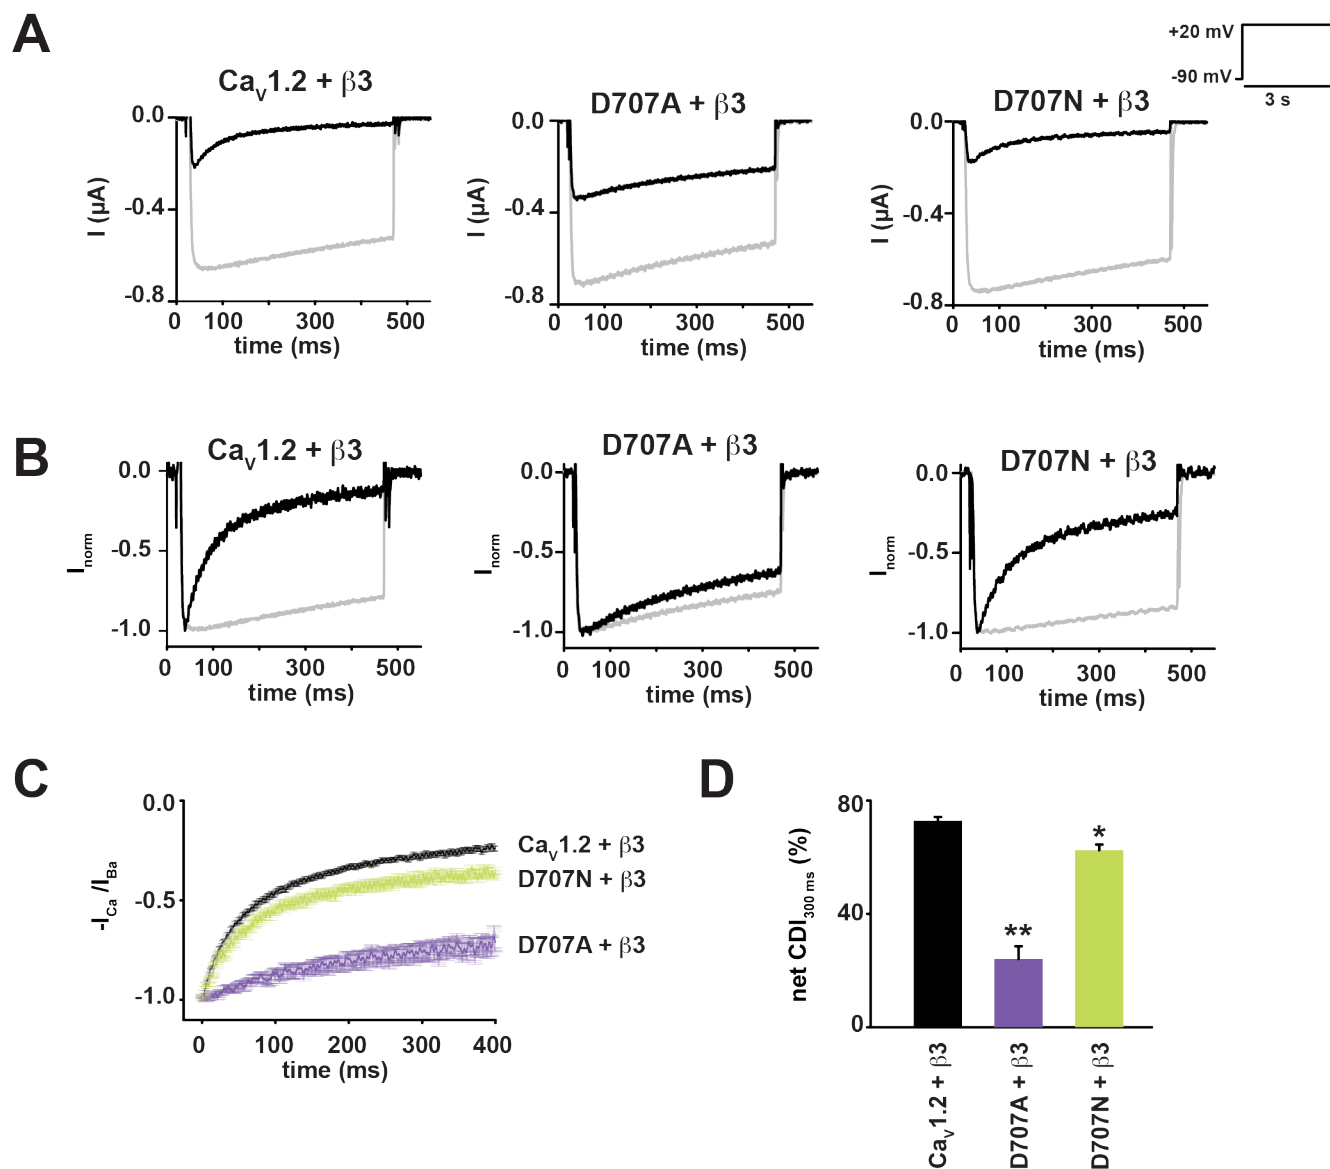

**Figure S3 Ca<sub>v</sub>1.2 selectivity filter mutations affect CDI independently of Ca<sub>v</sub>β. Related to Figure 1.** **A**, Exemplar raw traces recorded at +20 mV in Ca<sup>2+</sup> (black) or Ba<sup>2+</sup> (grey) from *Xenopus* oocytes expressing Ca<sub>v</sub>1.2 or the indicated mutants with Ca<sub>v</sub>β<sub>3</sub>. **B**, Normalized traces from 'A'. **C**, Ratio of normalized I<sub>Ca</sub>/I<sub>Ba</sub> currents (net CDI, (Barrett and Tsien, 2008; Findeisen and Minor, 2009)) showing average plots ± s.e.m. **D**, net CDI 300-ms post-depolarization. '\*\*' indicates p<0.01 and '\*\*\*' indicates p<0.001 compared to Cav1.2. n = 5-10.

# Figure S4

Abderemane-Ali *et al.*

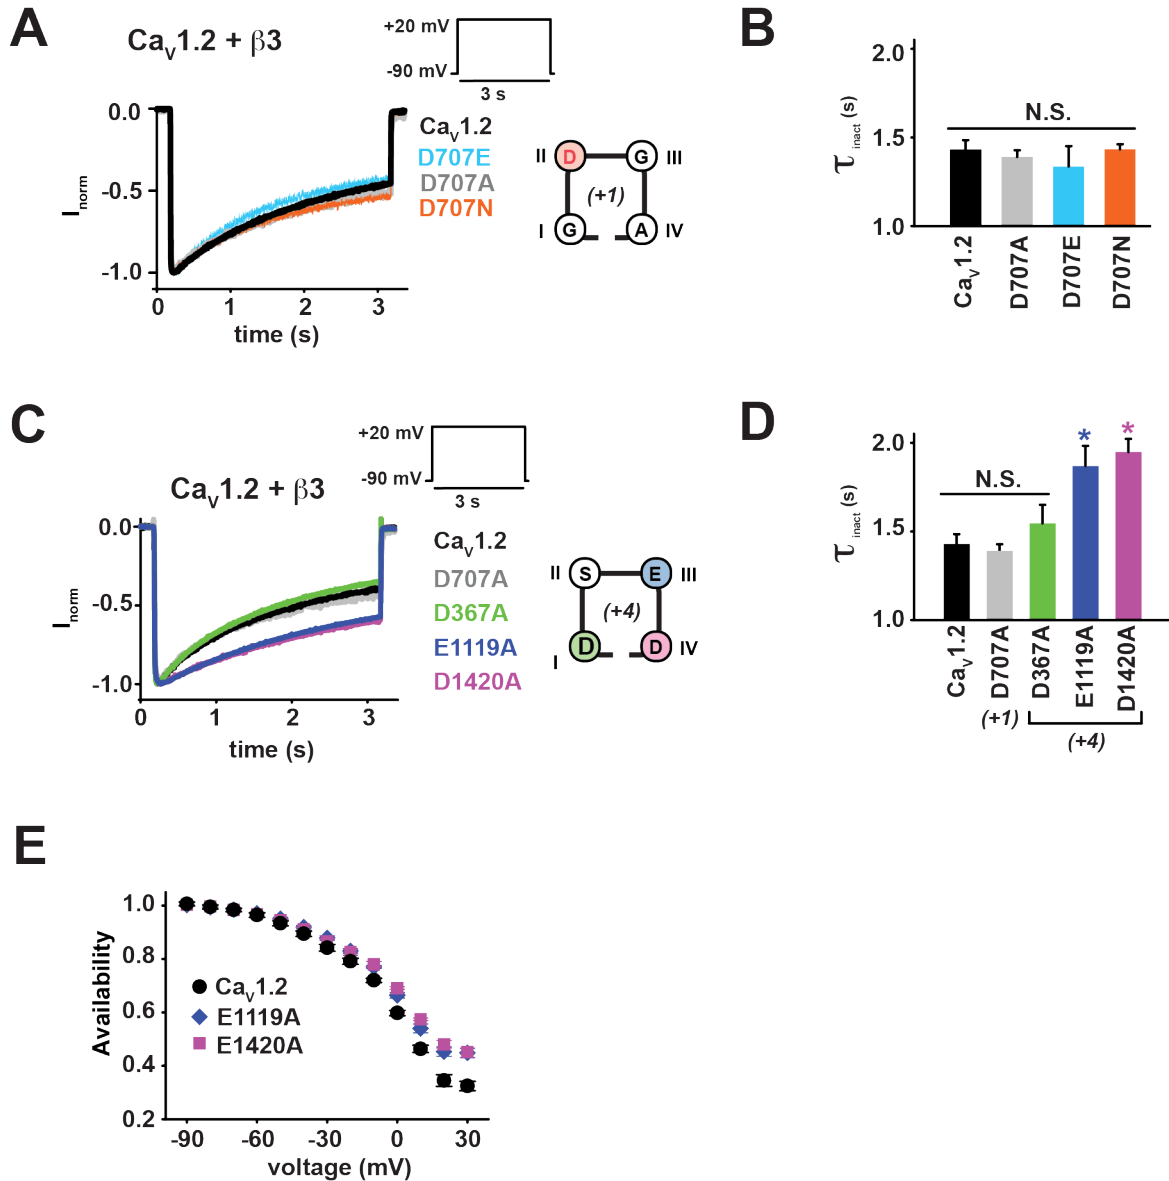

**Figure S4 DII (+1) aspartate mutations affecting CDI spare VDI.** Related to Figure 1. **A**, Exemplar two electrode voltage clamp recordings at +20 mV from *Xenopus* oocytes expressing  $Ca_v1.2$  (black),  $Ca_v1.2$  D707A (grey),  $Ca_v1.2$  D707E (light blue), or  $Ca_v1.2$  D707N (orange) with  $Ca_v\beta_3$ . **B**,  $\tau_{inact}$  for 'A'.  $n = 6-15$ . **C**, Exemplar two electrode voltage clamp recordings at +20 mV from *Xenopus* oocytes expressing  $Ca_v1.2$  (black),  $Ca_v1.2$  D707A (grey),  $Ca_v1.2$  D367A (green),  $Ca_v1.2$  E1119A (blue), or  $Ca_v1.2$  D1420A (pink) with  $Ca_v\beta_3$ . **D**,  $\tau_{inact}$  for 'C'.  $n = 9-19$ . '\*' indicates  $p < 0.001$ , and 'N.S.' indicates 'not statistically significant' compared to  $Ca_v1.2$ . **E**, Voltage-dependent inactivation curves representing channel availability after a steady-state inactivation at the indicated potentials.

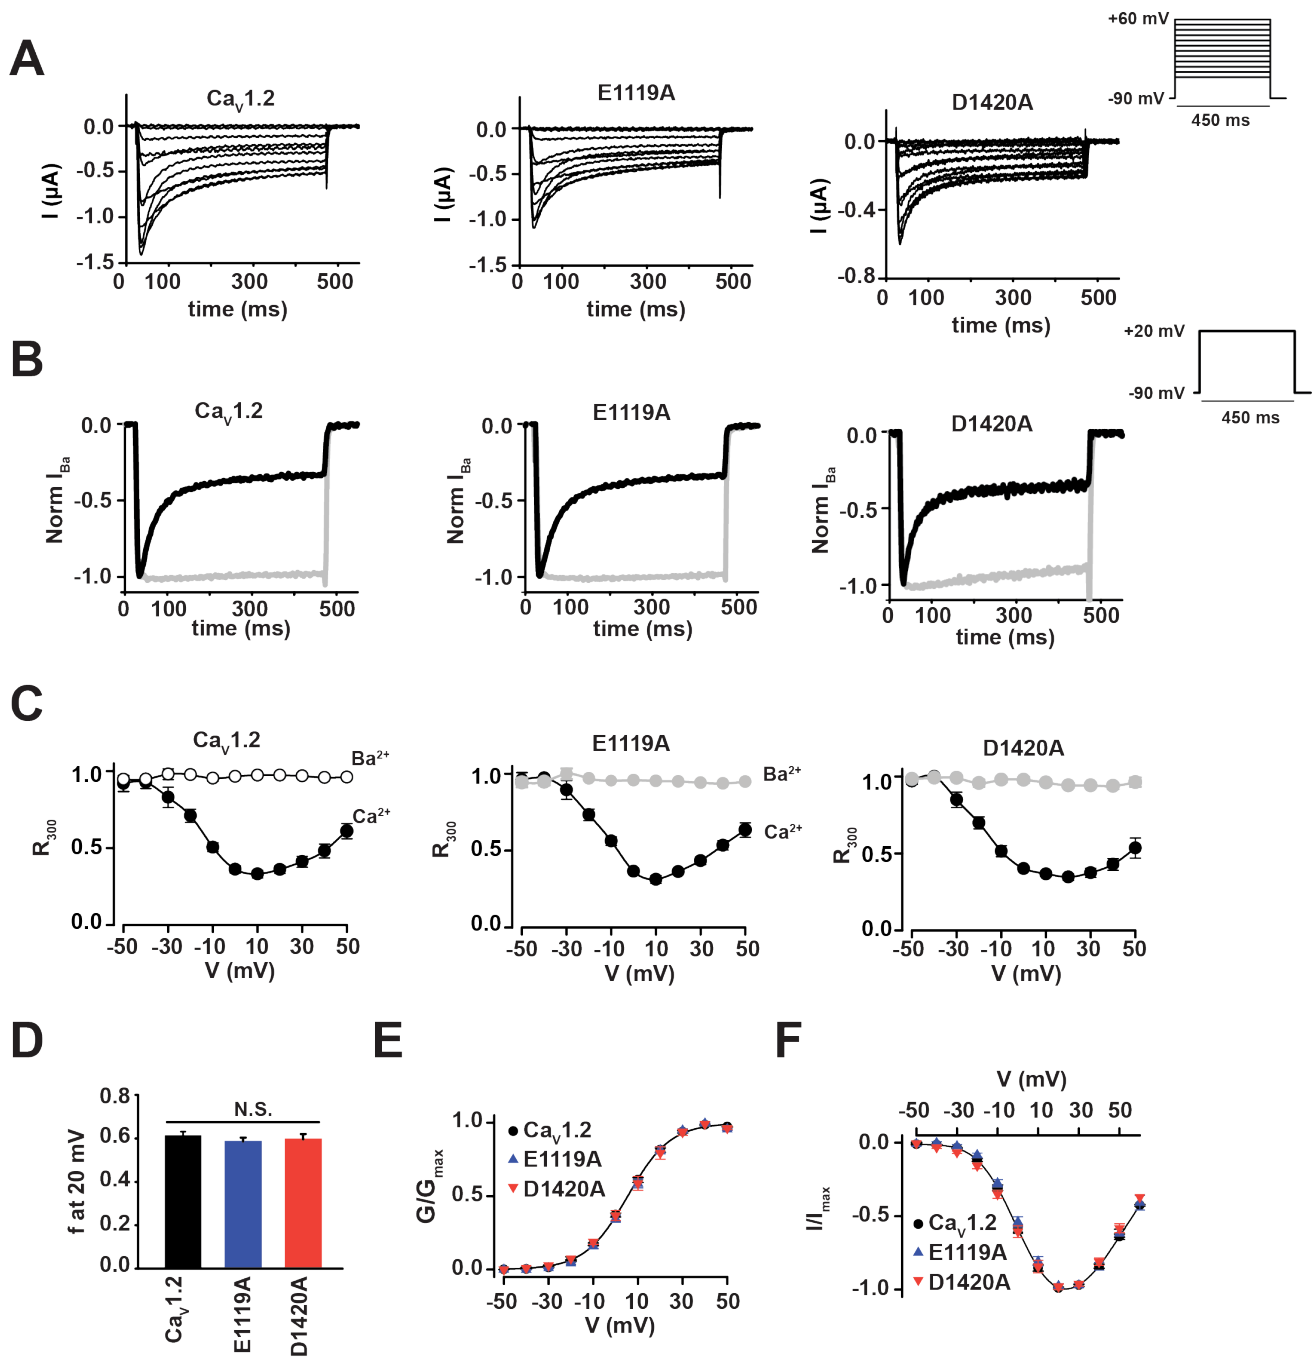

**Figure S5 SF (+) mutations affecting VDI spare CDI. Related to Figure 1.** **A**, Exemplar traces recorded in *Xenopus* oocytes co-expressing Ca<sub>v</sub>1.2, Ca<sub>v</sub>1.2 E1119A, or Cav1.2 D1420A with Cavβ<sub>2a</sub> in response to the indicated protocol. **B**, Exemplar normalized recordings at +20 mV in Ca<sup>2+</sup> (black) or Ba<sup>2+</sup> (grey) from *Xenopus* oocytes expressing Ca<sub>v</sub>1.2, Ca<sub>v</sub>1.2 E1119A, or Cav1.2 D1420A. **C**, Fractional current remaining 300 ms post-depolarization (R<sub>300</sub>) as a function of the membrane potential for channels in 'B'. **D**, Average fraction CDI (f) at +20 mV. 'N.S.' indicates 'not statistically significant'. n values are found in Table 1. **E**, Voltage-dependent activation curves for Ca<sub>v</sub>1.2 (black circles), Ca<sub>v</sub>1.2 E1119A (blue triangles), and Cav1.2 D1420A (red inverted triangles). **F**, I-V relationships for the indicated channels. Symbols are the same as 'E'.

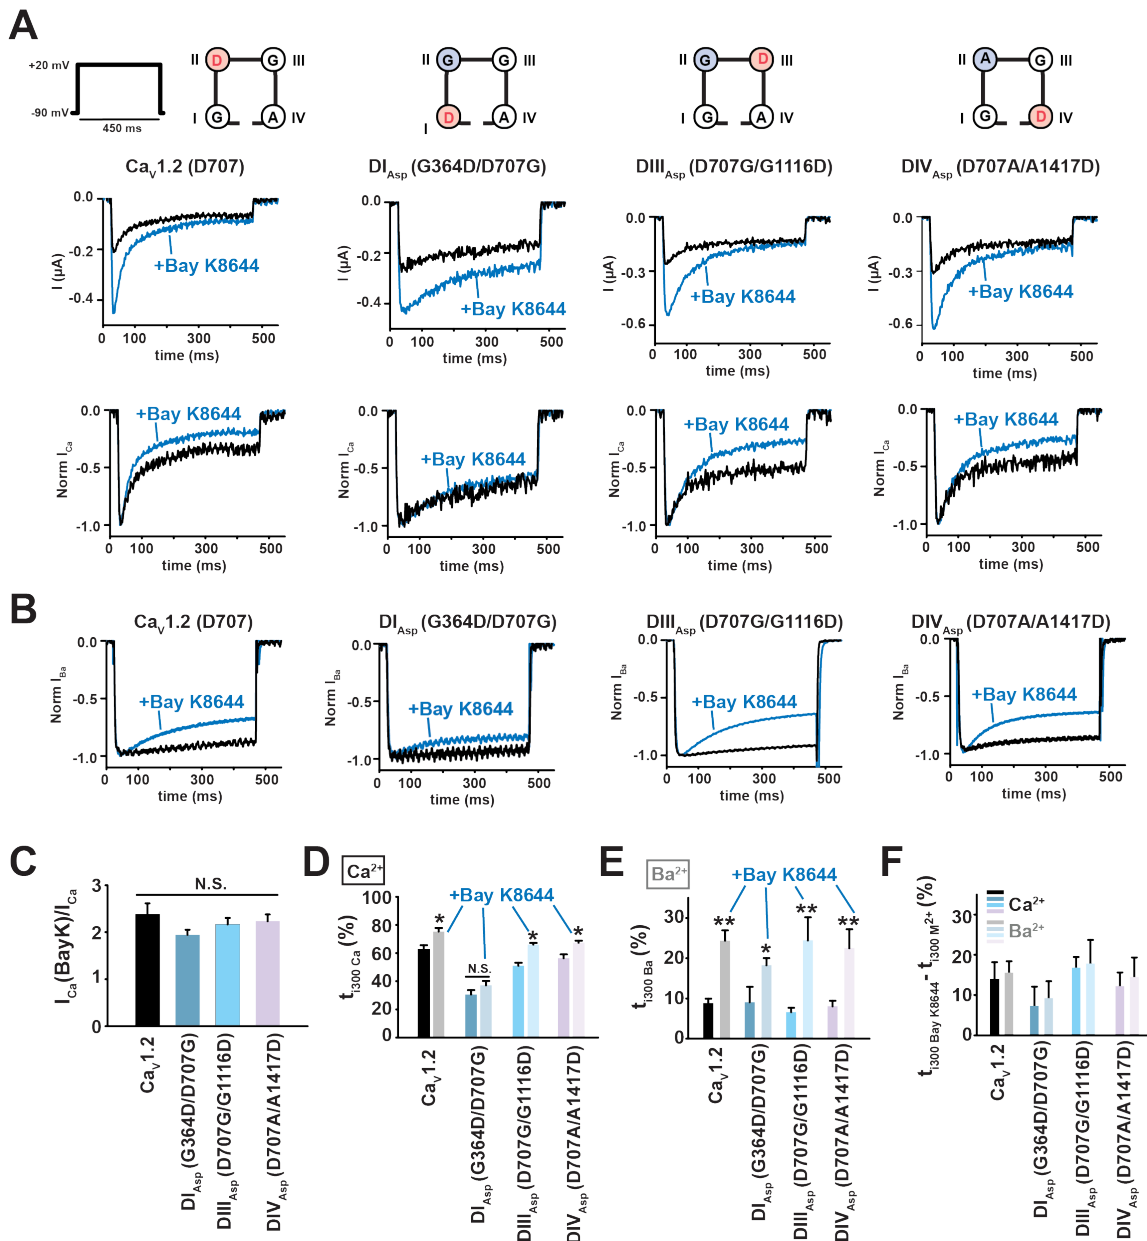

**Figure S6 Ca<sub>v</sub>1.2 CDI requires a negative charge at +1 position on DII, DIII, or DIV, not DI, regardless of the amount of Ca<sup>2+</sup> influx. Related to Figures 3 and 5. A**, Exemplar Ca<sup>2+</sup> currents in response to a +20 mV depolarization from *Xenopus* oocytes, co-expressing Ca<sub>v</sub>1.2 or the indicated mutants with Cavβ<sub>2a</sub> in the absence (black) or presence of 5 μM Bay K8644 (blue). Raw traces (upper panels) and normalized traces (lower panels) are shown to illustrate Bay K8644 effects on both the peak current and inactivation, respectively. **B**, Exemplar normalized Ba<sup>2+</sup> currents from *Xenopus* oocytes expressing Ca<sub>v</sub>1.2 or the indicated mutants, in response to a +20 mV depolarization in absence (black) or in presence of 5 μM Bay K8644 (blue). **C**, Ratio of Ca<sup>2+</sup> current amplitudes in presence, I<sub>Ca</sub>(BayK), and in absence, I<sub>Ca</sub>, of Bay K8644. ‘N.S.’ indicates not statistically different. n = 4-7. **D** and **E**, Percentage of inactivation 300 ms post-depolarization (t<sub>300</sub>) in the absence (dark bars) and presence of Bay K8644 (light bars) on recordings performed using **D**, Ca<sup>2+</sup>, or **E**, Ba<sup>2+</sup> as the charge carrier. ‘\*’ indicates p<0.01 and ‘\*\*\*’ indicates p<0.001. n= 6-11. **F**, Difference in t<sub>300</sub> induced by Bay K8644 in Ca<sup>2+</sup> (dark bars) and Ba<sup>2+</sup> (light bars).
